1 **Immune stimulation reduces sleep and memory ability**

2 **in *Drosophila melanogaster***

3

4 Mallon, E.B.<sup>a</sup>, Alghamdi, A.<sup>b</sup>, Holdbrook, R.T.K.<sup>a</sup> & Rosato, E.<sup>c</sup>

5 <sup>a</sup>Biology Department, University of Leicester, Leicester LE1 7RH, United Kingdom

6 <sup>b</sup>Department of Biology, Taif university, Saudi Arabia

7 <sup>c</sup>Genetics Department, University of Leicester, Leicester LE1 7RH, United Kingdom

8

9

10

11

12

13

14

15

16

17

18 Corresponding author

19 Eamonn Mallon

20 Department of Biology

21 University of Leicester

22 Tel: +44 (0)116 2523488

23 Fax: +44 (0)116 2523330

24 Email: [ebm3@le.ac.uk](mailto:ebm3@le.ac.uk)

25

26 **Abstract**

27 Psychoneuroimmunology studies the increasing number of connections between  
28 neurobiology and immunology. We establish *Drosophila melanogaster* as a tractable  
29 model in this field by demonstrating the effects of the immune response on two  
30 fundamental behaviours: sleep and memory ability.

31 We used the Geneswitch system to upregulate peptidoglycan receptor protein (PGRP)  
32 expression, thereby stimulating the immune system in the absence of infection.  
33 Geneswitch was activated by feeding the steroid RU486, to the flies. Importantly, by  
34 stimulating the immune system of adult flies in the absence of infection we have  
35 avoided the added complications of developmental and disease effects that have  
36 confounded other studies. We used an aversive classical conditioning paradigm to  
37 quantify memory and measures of activity to infer sleep.

38 Immune stimulated flies exhibited reduced levels of sleep, which could not be  
39 explained by a generalised increase in waking activity. The effects on sleep were more  
40 pronounced for day compared to night sleep. Immune stimulated flies also showed a  
41 reduction in memory abilities.

42 These are important results as they establish *Drosophila* as a model for immune-neural  
43 interactions and provide a possible role for sleep in the interplay between the immune  
44 response and memory.

45 **Keywords**

46 immune-neural interactions, imd, geneswitch, PGRP-LCa

## 47 **Introduction**

48 Psychoneuroimmunology, in vertebrates, studies the connections between neurobiology  
49 and immunology[1]. In invertebrates, immune response negatively affects learning and  
50 memory in bees[2]. A tractable invertebrate model of these immune-neural links would  
51 provide a fillip to this field[3]. The fruit fly, *Drosophila melanogaster*, has been  
52 tremendously helpful to the analysis of associative learning[4] and immunity[5]. In this  
53 paper we demonstrate immune-memory links in *Drosophila* and further expand the  
54 paradigm by showing immune-sleep interactions in flies.

55 Sleep is a resting state where the sleeper exhibits inattention to the environment and is  
56 usually immobile[6]. *Drosophila melanogaster* like vertebrates have been shown to  
57 have a distinct sleep state. In flies, a sleep episode is defined as a period of immobility  
58 lasting five minutes or longer[7,8]. Such intervals are associated with reversible  
59 increases in arousal threshold, which can be further augmented following sleep  
60 deprivation[9], are associated with changes in brain electrical activity[10], and are  
61 reduced by several drugs like caffeine and modafinil and are increased by  
62 antihistamines[7,8]. As in mammals, sleep deprivation leads to a rebound in quantity of  
63 sleep[8].

64 Infections increase sleep in humans, most likely through induction of proinflammatory  
65 cytokines[11]. Similarly, Kuo infected flies with gram-negative bacteria, leading to an  
66 increase in sleep[12]. On the contrary, Shirasu-Hiza infected flies with gram-positive  
67 bacteria and observed that they slept less[13]. The latter agrees with findings of  
68 increased immune gene transcription and resistance to disease in sleep-deprived flies or  
69 in reduced sleep phenotype transgenic flies[14,15].

70 Experiments, looking at the effect of immunity, often confound the disease used to  
71 stimulate the immune system and the immune response itself. Here, we activated the  
72 immune system non-pathogenically. We used Geneswitch[16] to up-regulate  
73 peptidoglycan receptor protein LCa (PGRP-Lca) in adult flies. PGRP-Lca is a pattern  
74 recognition protein that recognizes gram-negative bacteria, setting off the IMD immune  
75 pathway and leading to the expression of antimicrobial peptides[17]. Geneswitch is  
76 activated in the presence of the steroid RU486. We used an aversive classical  
77 conditioning paradigm to measure memory abilities of flies[18]. Sleep was measured  
78 using the *Drosophila* Activity Monitoring System 2 (DAMS2, Trikinetics, Waltham,  
79 MA).

80

## 81 **Methods and Materials**

82 The Geneswitch line  $w^{1118}; P\{w^{+mW.hs=Switch1}\}bun^{Switch1.32}$  (hereafter referred to as  
83 *GS1.32*) drives expression of RU486-activated GAL4 in adult fat bodies[17]  
84 (<http://flystocks.bio.indiana.edu>). The three genotypes used were *GS1.32>PGRP-*  
85 *Lca*( $w^{1118};GS1.32/+; UAS-PGRP-Lca/+$ ), and the control genotypes *GS1.32/+(w^{1118};*  
86 *GS1.32/+; +/+)* and *+/PGRP-Lca (+/+;UAS-PGRP-Lca/+)*.

87 Flies were maintained under standard conditions. Males and females were selected at  
88 eclosion and flies were 1–3 days old at the beginning of the experiment. Both sexes  
89 were used for the memory assay. As is common in fly research, only males were used  
90 for the sleep assay due to their more extreme phenotypes[19].

91

### 92 Geneswitch

93 RU486 was added to *Drosophila* food (200  $\mu$ M final concentration). For the memory  
94 assay, flies were fed for two days with RU486 before the start of the training and  
95 returned to the RU486 food after training. For the sleep assay, flies were placed in vials  
96 containing RU486 food for two days to allow feeding. After two days flies were  
97 immediately loaded into tubes containing more of the RU486 food. For all lines we  
98 have flies fed with RU486 and genetically identical animals cultured on fly medium  
99 supplemented with an equal amount of vehicle (80% ethanol) that lacked RU486.

100

### 101 Memory assay

102 Each sample was a single sex group of 50 adult flies. Conditioning consisted of 5  
103 training sessions separated by 20min intervals. In each training session flies were first

104 exposed for 30s to one odorant simultaneously with mechanical shock delivered every  
105 5s. This period was followed by a 60s rest period (no odour and no shock). Then, for  
106 30s another odorant was delivered, without shock. Flies were either conditioned against  
107 3-octanol or 4-methylcyclohexanol (both 0.6ml/l of paraffin).

108 24 hours after the conditioning period flies were transported to the choice point of a T-  
109 maze, where they were allowed to choose between the two odors for 60s. The memory  
110 score was the proportion of individuals choosing the correct odour, i.e. not the one they  
111 were trained against. One hundred and fifteen replicates were carried out, distributed  
112 between the genotype, sex, RU486 (presence/absence) and odour used.

113

#### 114 Sleep assay

115 Locomotor activity was monitored by DAMS2, at 25°C, continuously for seventy-two  
116 hours under a 12:12 light:dark cycle. Output from DAMS2 was the number of times a  
117 fly crossed an infrared beam in a 1min period (bin). 384 flies were tested, divided  
118 between genotype and RU486 (presence/absence).

119

#### 120 Data analysis for sleep assay

121 The DAMS2 output was converted to three measures; 1) Sleepbins per hour: number of  
122 minutes when a fly is asleep in an hour, 2) Mean waking activity: the mean activity  
123 taking into account only those bins that are classified as 'waking' and 3) Bouts of sleep:  
124 the number of sleep episodes.

125 Flies sleep differently during the day and night[20]. Therefore for each dependent sleep  
126 variable we ran two ANOVAs one for day and one for night. The independent variables

127 were genotype and RU486 (presence/absence). The important term here is an  
128 interaction term between genotype and RU486. If this was significant, we could say the  
129 genotypes responded differently to the treatments. But we still would not know which  
130 genotype's response is different from which. It is quite possible that the two control  
131 genotypes' responses to treatment are different from each other but not statistically  
132 different from that of the immune stimulated genotype. This would be uninteresting.  
133 Therefore if the interaction term was significant here, I repeated this analysis twice,  
134 once for genotypes GS1.32>PGRP-Lca vs GS1.32/+ and once for genotypes  
135 GS1.32>PGRP-Lca vs +/- PGRP-Lca. If the interaction terms in both these ANOVAs  
136 are significant I can say that genotype GS1.32>PGRP-Lca (the immune stimulated  
137 genotype) responses differently to the control genotypes in either day or night. Using a  
138 Bonferroni correction the significance level  $\alpha$  was reduced to 0.0083 (0.05/6). All  
139 analysis was carried out using STATA12.

140

#### 141 Zone of inhibition assay

142 This assay measures antibacterial activity: it is based on the ability of immune proteins  
143 to inhibit bacterial growth when placed onto an agar plate seeded with bacteria  
144 (*Arthrobacter globiformis* 125 $\mu$ l of an overnight culture per 50ml of agar). Thirty  
145 seven GS1.32>PGRP-Lca flies, 17 fed RU486 and 20 not fed RU486 were used. Each  
146 fly was homogenized in 30 $\mu$ l of ringer solution. Five microlitres of the supernatant from  
147 the centrifuged solution (1300g for 10 min at 4°C) were pipetted into a hole on the  
148 agar plate. This was incubated for 48hrs (30°C). The resultant ZOI were measured as  
149 the mean of three diameters.

## 150 **Results**

151 Feeding RU486 to GS1.32>PGRP-Lca flies increased their antibacterial activity by 26% ( $t =$   
152 2.3263,  $df = 29.202$ ,  $p = 0.02715$ ).

### 153 Immune stimulation effects on memory

154 Genotype had a significant effect on memory score ( $F_{2,109} = 22.46$ ,  $p < 0.0001$ ). Neither  
155 sex, whether RU486 was used, nor odour used had a significant effect on memory  
156 score. GS1.32>PGRP-Lca flies, showed a 11.4% decrease in memory scores when fed  
157 RU468 relative to those not fed RU468 of the same genotype (interaction between  
158 genotype and RU486 was significant  $F_{2,109} = 5.76$ ,  $p = 0.0042$ ). See Figure 1. As  
159 feeding RU486 to GS1.32>PGRP-Lca flies leads to an increased immune response,  
160 immune stimulation decreases memory scores.

### 161 Immune stimulation effects on sleep

162 Immune stimulated males (GS1.32>PGRP-Lca fed with RU486) showed a 23%  
163 decrease in sleep during the day relative to controls (GS1.32>PGRP-Lca vs GS1.32/+:  
164  $F_{1,4607} = 136.29$ ,  $p < 0.00001$ , GS1.32>PGRP-Lca vs +/- PGRP-Lca:  $F_{1,4535} = 26.87$ ,  $p <$   
165  $0.00001$ ) and a 9% decrease at night (GS1.32>PGRP-Lca vs GS1.32/+:  $F_{1,4607} = 85.53$ ,  
166  $p < 0.00001$ , GS1.32>PGRP-Lca vs +/- PGRP-Lca:  $F_{1,4535} = 8.49$ ,  $p = 0.0036$ ). See  
167 Figure 2. There was no corresponding change in mean waking activity during the day  
168 ( $F_{2,6839} = 0.5$ ,  $p = 0.6044$ ), or during the night (GS1.32>PGRP-Lca vs GS1.32/+:  $F_{1,4607}$   
169  $= 63.34$ ,  $p < 0.00001$ , GS1.32>PGRP-Lca vs +/- PGRP-Lca:  $F_{1,4535} = 1.96$ , N.S.). There  
170 was no change in the number of sleep bouts during the day (GS1.32>PGRP-Lca vs  
171 GS1.32/+:  $F_{1,4607} = 6.42$ ,  $p = 0.0113$ , GS1.32>PGRP-Lca vs +/- PGRP-Lca:  $F_{1,4535} =$   
172  $10.43$ ,  $p = 0.0012$ ) and a small but significant increase (0.5%) at night (GS1.32>PGRP-



173 Lca vs GS1.32/+ :  $F_{1,4607} = 16.38$ ,  $p < 0.00001$ , GS1.32>PGRP-Lca vs +/- PGRP-Lca:

174  $F_{1,4535} = 7.56$ ,  $p = 0.0060$ ).

175 **Discussion**

176 Adult flies, which are immune stimulated but are secluded from the confounding  
177 effects of infection, exhibit reduced levels of sleep both during day and night.  
178 Immune stimulated flies have slightly more fragmented sleep at night, as evinced by  
179 an increase in the number of sleep bouts. The same immune stimulation also leads to a  
180 reduction in memory abilities.

181 The reduction in sleep cannot be explained simply in terms of a generalised increase  
182 in activity. Stimulating the immune response had no effect on mean waking activity  
183 during the day or night, but these flies slept less than the non-stimulated controls.

184 Our sleep results agree with a previous study by Shirasu-Hiza showing a similar  
185 outcome after gram-positive bacterial infections[13]. However Kuo[12] found that  
186 when they infected flies with gram-negative bacteria, the flies slept more. The  
187 discrepancies in sleep were explained by Kuo *et al.* as being due to different types of  
188 infection. Our work did not use an infection but rather a direct stimulation of the  
189 immune response. By upregulating PGRP-Lca we reproduced the immune response  
190 associated with gram-negative bacteria. This suggests that if type of infection were  
191 the cause of the discrepancies, our results would have just mirrored those of Kuo *et al.*  
192 The two previous experiments were different in numerous other methodical aspects,  
193 e.g. strength of infection, lighting paradigm, when the phenotype was measured. Any  
194 of these could have explained the discrepancy.

195 Although Imd is one of the canonical immune pathways in insects, over-expression of  
196 the Imd pathway can also lead to apoptosis[21,22]. It cannot be excluded that our  
197 results could be caused by a side effect: apoptosis of the fat body by the Imd pathway  
198 rather than its main effect of immune response. This will be examined in future work.

199 We have shown that immune response decreases sleep and memory in *Drosophila*  
200 *melanogaster*. A possible link between all three systems is intriguing. One of the main  
201 hypotheses on sleep function is that sleep periods are favourable for brain plasticity  
202 and in the adult brain for learning and memory[23]. Like humans, flies with a  
203 fragmented sleep show impaired learning compared with flies with consolidated  
204 sleep[24]. Flies also exhibit decreases in learning after 6 or 12 hours of sleep  
205 deprivation[25]. We propose sleep as an intermediate between immunity and memory.  
206 We hypothesise that it is not the activation of the immune system *per se* that affects  
207 memory in flies, but rather that immune stimulation reduces the length and quality of  
208 sleep that in turn, reduces memory ability. However, with our current data, we cannot  
209 exclude that in flies the level of immune activation has a direct effect on memory and  
210 this will be the basis of future work.

211

212 **Acknowledgements**

213 ER and AA were funded by BBSRC grant BB/H018093/1 and a Saudi government

214 scholarship respectively.

## References

- 215 1 Ader, R., Felten, D. L. & Cohen, N. 1991 *Psychoneuroimmunology*. 2nd edn. San  
216 Diego: Academic Press.
- 217 2 Alghamdi, A., Dalton, L., Phillis, A., Rosato, E. & Mallon, E.B. 2008 Immune  
218 response impairs learning in free-flying bumble-bees. *Biol. Lett.* **4**, 479–481.
- 219 3 Aubert, A. 2007 Invertebrate studies and the evolution of comparative  
220 psychoneuroimmunology. *Brain. Behav. Immun.* **21**, 290–291.
- 221 4 Kim, Y. C., Lee, H. G. & Han, K. A. 2007 Classical reward conditioning in  
222 *Drosophila melanogaster*. *Genes Brain Behav.* **6**, 201–207.
- 223 5 Lemaitre, B. & Hoffmann, J. 2007 The host defense of *Drosophila melanogaster*.  
224 *Annu. Rev. Immunol.* **25**, 697–743.
- 225 6 Siegel, J. M. 2003 Why we sleep. *Sci. Am.* **289**, 92–97.
- 226 7 Hendricks, J. C., Finn, S. M., Panckeri, K. A., Chavkin, J., Williams, J. A., Sehgal,  
227 A. & Pack, A. I. 2000 Rest in *Drosophila* is a sleep-like state. *Neuron* **25**, 129–138.
- 228 8 Shaw, P. J., Cirelli, C., Greenspan, R. J. & Tononi, G. 2000 Correlates of sleep and  
229 waking in *Drosophila melanogaster*. *Science* **287**, 1834–1837.
- 230 9 Huber, R., Ghilardi, M. F., Massimini, M. & Tononi, G. 2004 Local sleep and  
231 learning. *Nature* **430**, 78–81. (doi:10.1038/Nature02663)
- 232 10 Nitz, D. A., Van Swinderen, B., Tononi, G. & Greenspan, R. J. 2002  
233 Electrophysiological correlates of rest and activity in *Drosophila melanogaster*.  
234 *Curr. Biol.* **12**, 1934–1940.
- 235 11 Bryant, P. A., Trinder, J. & Curtis, N. 2004 Sick and tired: Does sleep have a  
236 vital role in the immune system? *Nat. Rev. Immunol.* **4**, 457–467.
- 237 12 Kuo, T. H., Pike, D. H., Beizaeipour, Z. & Williams, J. A. 2010 Sleep  
238 triggered by an immune response in *Drosophila* is regulated by the circadian clock  
239 and requires the NF kappa B Relish. *Bmc Neurosci.* **11**.
- 240 13 Shirasu-Hiza, M. M., Dionne, M. S., Pham, L. N., Ayres, J. S. & Schneider, D.  
241 S. 2007 Interactions between circadian rhythm and immunity in *Drosophila*  
242 *melanogaster*. *Curr. Biol.* **17**, R353–R355.
- 243 14 Cirelli, C., Bushey, D., Hill, S., Huber, R., Kreber, R., Ganetzky, B. & Tononi,  
244 G. 2005 Reduced sleep in *Drosophila shaker* mutants. *Nature* **434**, 1087–1092.
- 245 15 Williams, J. A., Sathyanarayanan, S., Hendricks, J. C. & Sehgal, A. 2007  
246 Interaction between sleep and the immune response in *Drosophila*: A role for the  
247 NF kappa B relish. *Sleep* **30**, 389–400.

- 248 16 Osterwalder, T., Yoon, K. S., White, B. H. & Keshishian, H. 2001 A  
249 conditional tissue-specific transgene expression system using inducible GAL4.  
250 *Proc. Natl. Acad. Sci. U. S. A.* **98**, 12596–12601.
- 251 17 Gottar, M., Gobert, V., Michel, T., Belvin, M., Duyk, G., Hoffmann, J. A.,  
252 Ferrandon, D. & Royet, J. 2002 The *Drosophila* immune response against Gram-  
253 negative bacteria is mediated by a peptidoglycan recognition protein. *Nature* **416**,  
254 640–644.
- 255 18 Mery, F. & Kawecki, T. J. 2005 A cost of long-term memory in *Drosophila*.  
256 *Science* **308**, 1148–1148.
- 257 19 Isaac, R. E., Li, C. X., Leedale, A. E. & Shirras, A. D. 2010 *Drosophila* male  
258 sex peptide inhibits siesta sleep and promotes locomotor activity in the post-mated  
259 female. *Proc. R. Soc. B-Biol. Sci.* **277**, 65–70.
- 260 20 Ishimoto, H., Lark, A. & Kitamoto, T. 2012 Factors that Differentially Affect  
261 Daytime and Nighttime Sleep in *Drosophila melanogaster*. *Front. Neurol.* **3**, 1–5.
- 262 21 Georgel, P. et al. 2001 *Drosophila* immune deficiency (IMD) is a death  
263 domain protein that activates antibacterial defense and can promote apoptosis. *Dev.*  
264 *Cell* **1**, 503–514.
- 265 22 Leulier, F., Parquet, C., Pili-Floury, S., Ryu, J. H., Caroff, M., Lee, W. J.,  
266 Mengin-Lecreulx, D. & Lemaitre, B. 2003 The *Drosophila* immune system detects  
267 bacteria through specific peptidoglycan recognition. *Nat. Immunol.* **4**, 478–484.
- 268 23 Maquet, P. 2001 The role of sleep in learning and memory. *Science* **294**,  
269 1048–1052.
- 270 24 Seugnet, L., Suzuki, Y., Vine, L., Gottschalk, L. & Shaw, P. J. 2008 D1  
271 Receptor Activation in the Mushroom Bodies Rescues Sleep-Loss-Induced  
272 Learning Impairments in *Drosophila*. *Curr. Biol.* **18**, 1110–1117.  
273 (doi:10.1016/j.cub.2008.07.028)
- 274 25 Seugnet, L., Suzuki, Y. & Shaw, P. J. 2006 A learning task sensitive to sleep  
275 deprivation in *Drosophila*. *Sleep* **29**, A367–A368.

278 Figure Legends

279

280 Figure 1. Memory score for each genotype. Memory score is the proportion of flies  
281 that choose the odour they were not trained against. The white boxes represent the  
282 mean memory score for the RU486- flies. The grey boxes represent the RU486+ flies.  
283 The grey dots are the individual data points.

284

285

286 Figure 2. Sleepbins for each genotype. The black points represent the means of  
287 sleepbins for the RU486- flies. The grey points represent the RU486+ flies. The  
288 shaded times are night (lights off).

289

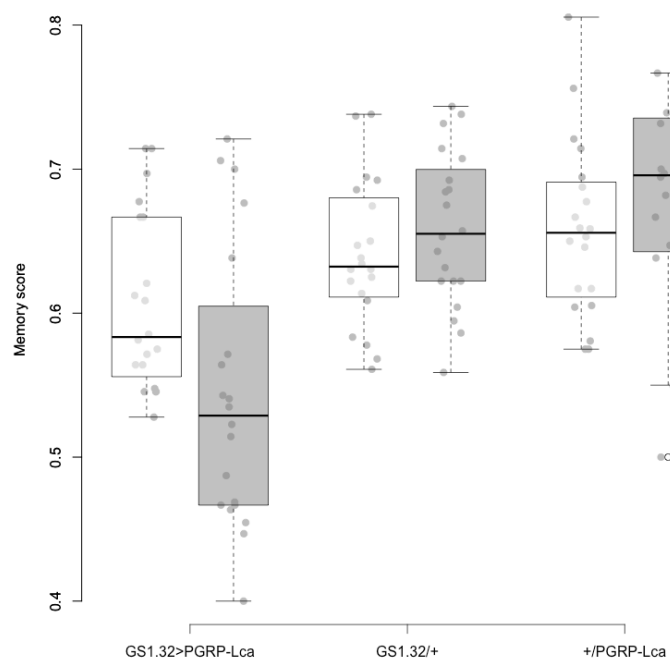

290  
291 Figure 1.  
292



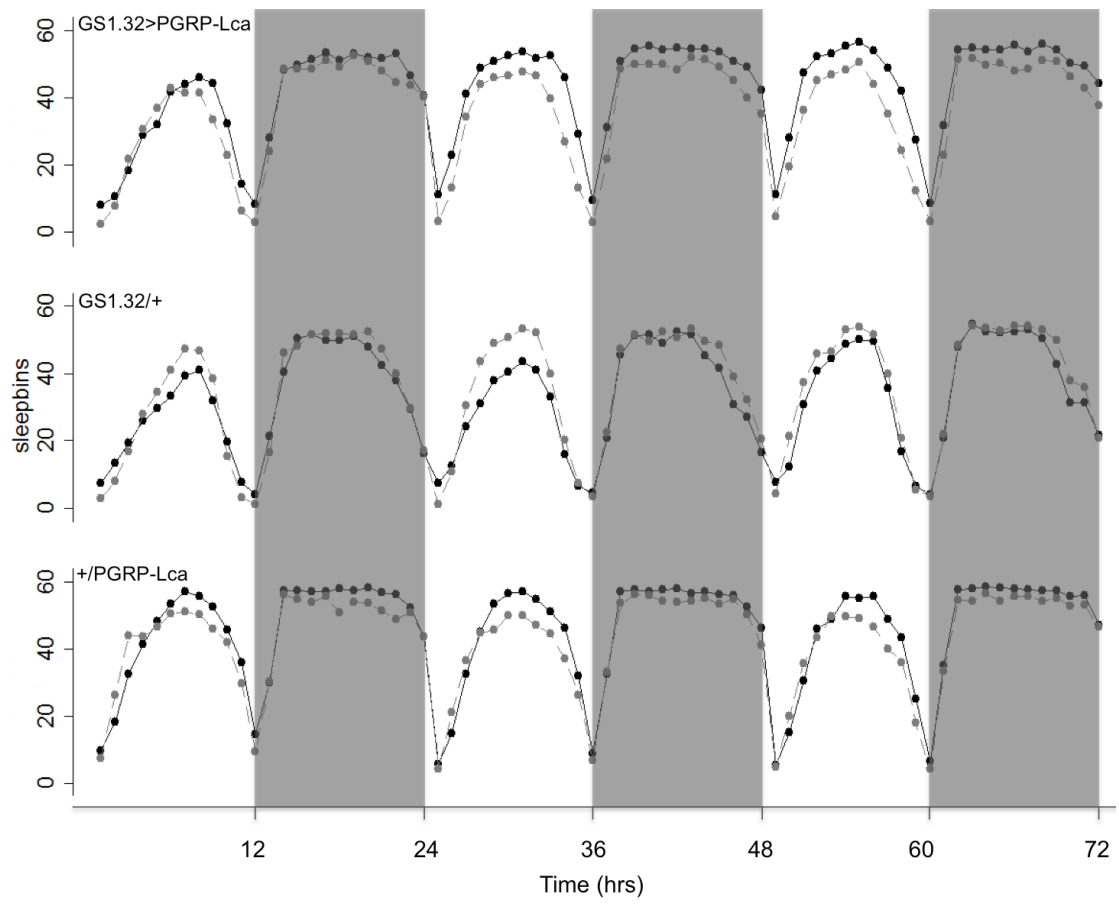

293  
294 Figure 2
